# Supplementary material for: Self-assembled peptide nanorods as building blocks of fractal patterns
Source: Royal Society of Chemistry journal article supplement (doi:10.1039/b919782f), 2009-01-01
Supplement: b919782f.pdf [file b919782f.pdf]

## Self-Assembled Peptide Nanorods as Building Blocks of Fractal Patterns

Weiping Wang and Ying Chau\*

### Supporting data

SEM images:

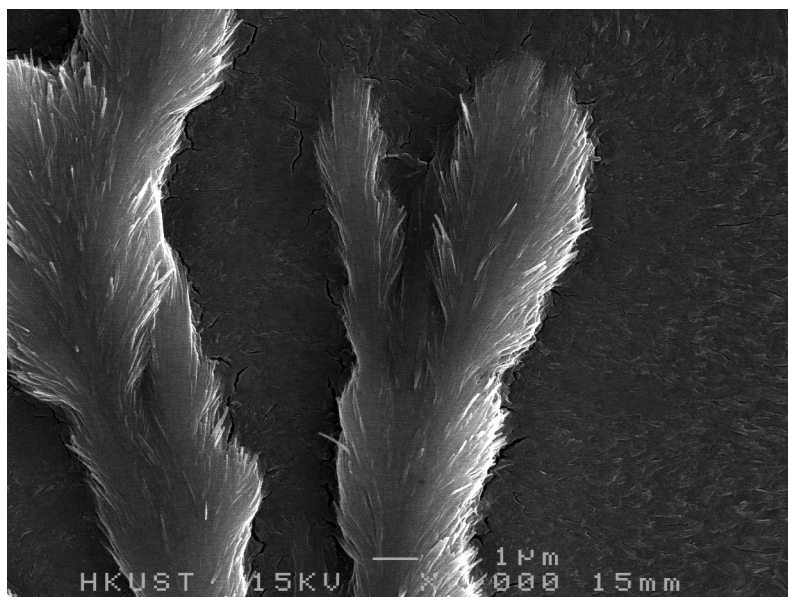

**Fig. S1.** SEM image of one branch of a fractal from 10 mg mL<sup>-1</sup> FPTP pre-incubated solution on a silicon wafer.

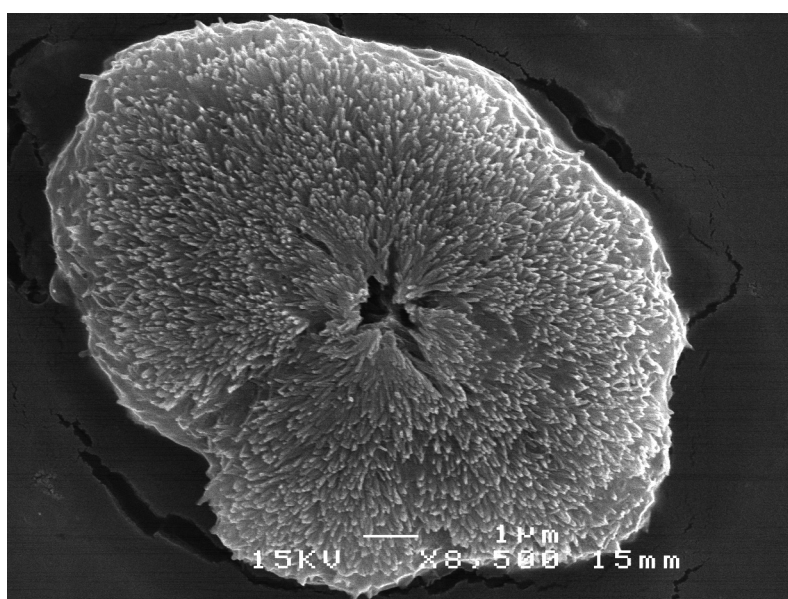

**Fig. S2.** SEM image of a drying sample from 1 mg mL<sup>-1</sup> FPT solution on a silicon wafer.
